# Supplementary material for: Aboveground biomass estimation using multimodal remote sensing observations and machine learning in mixed temperate forest
Source: Research Square preprint supplement (doi:10.21203/rs.3.rs-5713585/v1), 2025-01-23
Supplement: Supplementary file 1 [file a0998907a5434a43c284205c.docx]

**Tables**

**Table 1**

**Table 1:** Evaluation metrics of random forest regression models. The values were calculated by comparing the random forest model predicted biomass with the Forest Inventory and Analysis estimates of the left out 20% of the testing data.

| **Group of variables/ metrics** | **Model** | **Hyperpara--meters** | **RMSE/ Mgha-1** | **MSE/ (Mgha-1 )2** | **R squared** | **% Var explained** |
| --- | --- | --- | --- | --- | --- | --- |
| All metrics | All_RF01 | Default | 31.13 | 969.26 | 0.19 | 18.55 |
| All_RF02 | Ntree 400 | 31.79 | 1010.59 | 0.15 | 14.56 |
| All_RF03 | Tuned | **27.19** | **739.46** | **0.41** | **40.54** |
| Lidar metrics | LiDAR_RF01 | Default | 31.74 | 1007.48 | 0.01 | 0.82 |
| LiDAR_RF02 | Ntree 300 | 32.12 | 1031.60 | -0.02 | -1.54 |
| LiDAR_RF03 | Tuned | 27.88 | 777.32 | 0.23 | 23.49 |
| Image metrics | Img_RF01 | Default | 32.34 | 1045.98 | -0.03 | -2.96 |
| Img_RF02 | Ntree 300 | 32.07 | 1028.68 | -0.01 | -1.25 |
| Img_RF03 | Tuned | 26.50 | 702.48 | 0.31 | 30.85 |

**Table 2**

**Table 2:** Evaluation metrics of the plot-pixel analysis among the existing map products and the optimum random forest model biomass predictions with Forest Inventory and Analysis field biomass estimates.

| **Metric** | **RF** | **MAP_1** | **MAP_2** | **MAP_3** |
| --- | --- | --- | --- | --- |
| **RMSE** | 28.33 | 145.35 | 82.47 | 81.84 |
| **MSE** | 802.69 | 21127.57 | 6802.01 | 6697.55 |
| **R-squared** | 0.39 | 0.01 | 0.20 | 0.10 |
| **Mean** | 43.92 | 175.01 | 127.09 | 119.29 |
| **Variance** | 277.78 | 5170.04 | 216.60 | 1738.56 |

**Appendix 1**

**Appendix 1:** Variables derived from the 2016 Light Detection and Ranging (LiDAR) data. Raster data derived from LiDAR point clouds, which served as explanatory variables for model training and testing.

| Analysis | No. | Variable | Label | Literature cited |
| --- | --- | --- | --- | --- |
| DEM | 1 | Slope from DEM | slope | 79, 80 |
| FUSION height bins | 2 | 0-5m | hb_0_5 | 28 |
| 3 | 5-10m | hb_5_10 |
| 4 | 10-15m | hb_10_15 |
| 5 | 15-20m | hb_15_20 |
| 6 | 20-25m | hb_20_25 |
| 7 | >25m | hb_more25 |
| FUSION densities | 8 | 0-5m | dens_0_5 | 28 |
| 9 | 5-10m | dens_5_10 |
| 10 | 10-15m | dens_10_15 |
| 11 | 15-20m | dens_15_20 |
| 12 | 20-25m | dens_20_25 |
| 13 | >25m | dens_more25 |
| Height percentile (subplot level data) | 14 | 50th Percentile | p50th | 25, 21., 61, 18 |
| 15 | 60th Percentile | p60th |
| 16 | 70th Percentile | p70th |
| 17 | 75th Percentile | p75th |
| 18 | 80th Percentile | p80th |
| 19 | 85th Percentile | p85th |
| 20 | 90th Percentile | p90th |
| 21 | 95th Percentile | p95th |
| 22 | 99th Percentile | p99th |
| 23 | Kurtosis | lida_kurt |
| 24 | Median | lida_med |
| 25 | Mean | lida_mn |
| 26 | Skewness | lida_skw |
| 27 | Standard deviation | lida_stdv |
| Canopy height model | 28 | Canopy height (CHM) | cnpy_ht | 18 |
| Other FUSION/LDV LiDAR processing point cloud metrics | 29 | Maximum elevation | elv_max | 28 |
| 30 | Mean elevation | elv_mean | 81 |
| 31 | Canopy relief ratio | crr | 81 |

**Appendix 2**

**Appendix 2:** Variables derived from National Agriculture Imagery Program (NAIP) data of summer 2016. Raster data derived from NAIP imagery, which served as explanatory variables for model training and testing.

| Analysis | No. | Variable | Label | Literature Cited |
| --- | --- | --- | --- | --- |
| Principal component analysis | 01 | Principal component 1 | pca_1 | 82 |
| 02 | Principal component 2 | pca_2 |
| 03 | Principal component 3 | pca_3 |
| 04 | Principal component 4 | pca_4 |
| Green Co-occurrence | 05 | Mean | green_layer1 | 33,25, 83 |
| 06 | Variance | green_layer2 |
| 07 | Homogeneity | green_layer3 |
| 08 | Contrast | green_layer4 |
| 09 | Entropy | green_layer5 |
| 10 | Dissimilarity | green_layer6 |
| 11 | Second moment | green_layer7 |
| 12 | Correlation | green_layer8 |
| Red co-occurrence matrix | 13 | Mean | nir_layer1 | 33, 25; 83 |
| 14 | Variance | nir_layer2 |
| 15 | Homogeneity | nir_layer3 |
| 16 | Contrast | nir_layer4 |
| 17 | Dissimilarity | nir_layer5 |
| 18 | Entropy | nir_layer6 |
| 19 | Second moment | nir_layer7 |
| 20 | Correlation | nir_layer8 |
| Vegetation indices | 21 | Normalized difference vegetation index (NDVI) | naip_ndvi | 25, 60, 84 |
| 22 | Soil adjusted vegetation index (SAVI) | naip_savi |
| 23 | Green normalized difference vegetation index (GNDVI) | naip_gndvi |
| NAIP spectral response | 24 | Near infra-red (NIR) | naip_nir | 85 |
| 25 | Red band | naip_red |

**Appendix 3**

**Appendix 3:** Variables derived from Sentinel-2 2016. Raster data derived from Sentinel-2 image scenes and shapefile datasets which served as explanatory variables for model training and testing.

| Analysis | No. | Variable | Label | Literature Cited |
| --- | --- | --- | --- | --- |
| Vegetation indices | 01 | Enhanced vegetation index (EVI) | sen_evi | 86 |
| 02 | Green normalized difference vegetation index (GNDVI) | sen_gndvi | 34 |
| 03 | Normalized difference vegetation index (NDVI) | sen_ndvi | 34 |
| 04 | Soil adjusted vegetation index (SAVI) | sen_savi | 86 |
| 05 | Normalized difference moisture index (NDMI) | sen_ndmi | 87 |
| 06 | Normalized difference red edge (NDRE) | sen_ndre | 85, 87 |
| Sentinel-2 spectral response | 07 | Short wave infrared (SWIR 1610nm) | sen_swir | 88, 85 |
| 08 | Near infra-red (NIR 842nm) | sen_nir | 85 |
| 09 | Red band (665nm) | sen_red | 85 |
| Soil | 10 | Soil type | soil_type | 89 |
| CT CCAP | 11 | Landcover type | cover_type | 64 |

**Appendix 4**

**Appendix 4:** Hyperparameter combinations for each model belong to all three variable groups. The study utilizes exhaustive parameter tuning for RF03 models with grid search technique with 5-fold cross validation. Each technique was followed to maximize the robustness of the models in future utilization.

| **Variable group** | **Model** | **Tuned parameters** |
| --- | --- | --- |
| Group-1  combined (LiDAR and Image metrics) | All_RF01 | Default parameters of randomForest package were utilized (ntree is 500). |
| All_RF02 | ntree 400 and No. of variables tried at each split is 22 |
| All_RF03 | grid search method,ntree 400, mtry 5, best_min_samples_leaf 10, best_min_samples_split 10 and max depth is 1 are the tuned parameters |
| Group-2  (LiDAR metrics) | LiDAR_RF01 | Default parameters of randomForest package were utilized (ntree is 500) |
| LiDAR_RF02 | ntree 300 and No. of variables tried at each split is 10. |
| LiDAR_RF03 | grid search method, ntree 300, mtry 5, best_min_samples_leaf 10, best_min_samples_split 10 and max depth is 1 are the best parameters. |
| Group-3  (Image metrics) | Img_RF01 | Default parameters of randomForest package were utilized (ntree is 500) |
| Img_RF02 | ntree 300 and No. of variables tried at each split is 10. |
| Img_RF03 | grid search method, ntree 300, mtry 5, best_min_samples_leaf 10, best_min_samples_split 10 and max depth is 1 are the best parameters. |

**Appendix 5**

**Appendix 5:** The existing aboveground biomass maps used in the plot-pixel assessment.

| ID | Year | Reference | Data and models |
| --- | --- | --- | --- |
| MAP_1 | 2015 | 42 | Ecosystem demography (ED) model, national agriculture imagery program (NAIP), and the national land cover database (NLCD); and vegetation parameters from the forest inventory and analysis (FIA) program (Mgha-1). 90 m resolution |
| MAP_2 | 2005 | 43 | Forest inventory and analysis (FIA), MODIS, NLCD, topographic, tree-based algorithms in cubist (Mgha-1). 250m resolution |
| MAP_3 | 2021 | 44 | FIA 2009-2019, hexagon level, (pounds per acre) |
